# Supplementary material for: Changes in microbiome assembly of the pioneer Andean tree Alnus acuminata in response to land degradation
Source: Research Square preprint supplement (doi:10.21203/rs.3.rs-8660278/v1), 2026-01-29
Supplement: Supplementary file 1 [file aff6c85c0ea8c78b6f4424bd.docx]

**SUPPLEMENTARY INFORMATION**

**Changes in microbiome assembly of the pioneer Andean tree *Alnus acuminata* in response to land degradation**

Symbiosis

Nubia Guzmán1,2, Lara A. Quaglini2,3, Raffaella Ansaloni1, Mayra Jiménez1, Rodolfo Gentili2, Sandra Citterio2*

1Herbario Azuay, University of Azuay, Av. 24 de Mayo 7-77 y Hernán Malo, Cuenca, Ecuador.

2 Department of Earth and Environmental Sciences, University of Milano-Bicocca, Piazza della Scienza 1, 20126 Milan, Italy.

3Sezione di Botanica, Museo di Storia Naturale di Milano, Corso Venezia 55, 20121 Milan, Italy.

*Corresponding author: Sandra Citterio, University of Milano-Bicocca; email: [sandra.citterio@unimib.it](mailto:sandra.citterio@unimib.it)

Nubia Guzmán <https://orcid.org/0000-0002-9798-8195>

Lara A. Quaglini <https://orcid.org/0000-0003-1839-8021>

Raffaella Ansaloni <https://orcid.org/0000-0001-6704-1067>

Mayra Jiménez <https://orcid.org/0000-0003-3339-060X>

Rodolfo Gentili <https://orcid.org/0000-0002-9332-7963>

Sandra Citterio <https://orcid.org/0000-0001-5020-1095>


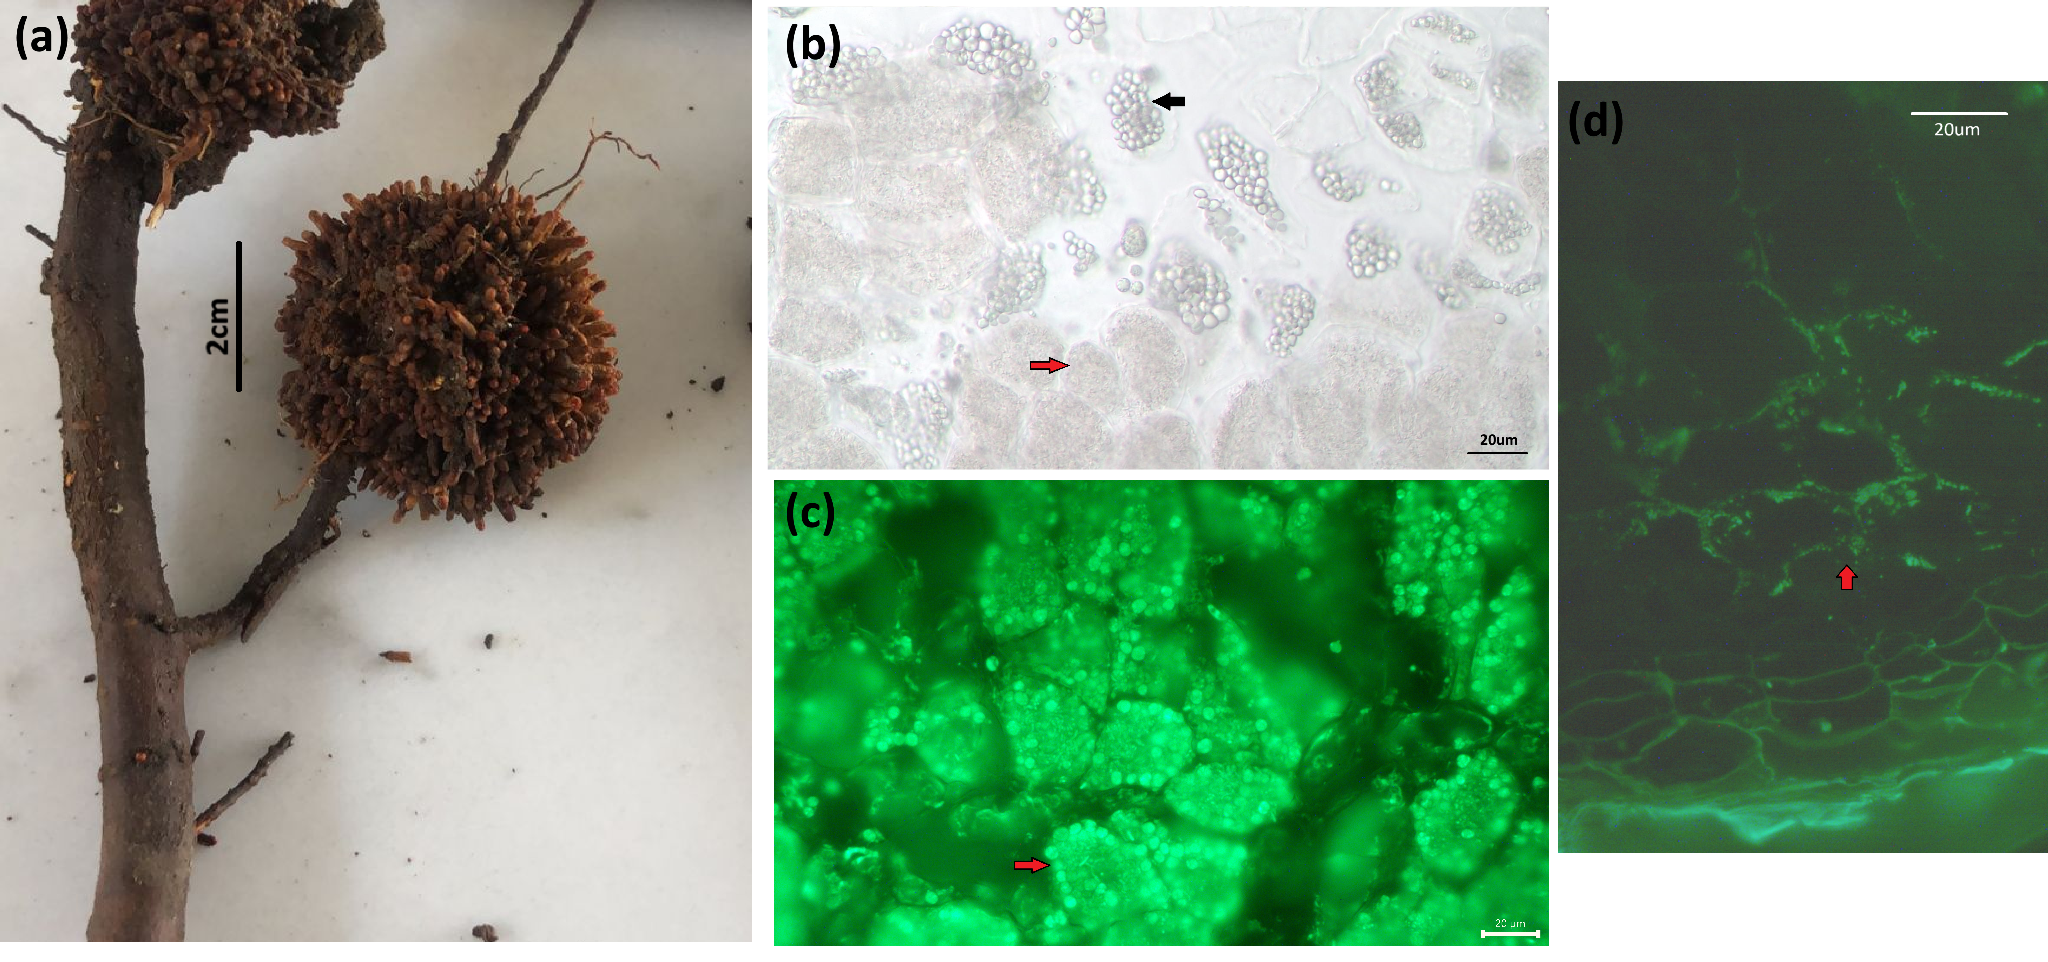


**Figure S1** Macroscopic and microscopic characteristics of *Alnus acuminata* root nodules: (a) photograph of root nodules showing its considerable size; (b-d) cross section of a nodule lobe showing associated bacteria, including (b) cortical cells colonized by *Frankia* (red arrow) and starch granules (black arrow), (c) fluorescence microscopy confirming the presence of *Frankia* (red arrow), and (d) other endophytic bacteria within the cortical cells of a nodule lobe (red arrow)

**Table S1** Dominant vegetation characteristic of the native forest (high montane evergreen forest) located within the Aguarongo Protected Vegetation Area

| **Family** | **Specie** | **Growth form** |
| --- | --- | --- |
| Araliaceae | *Oreopanax andreanus* Marchal | Tree |
| Araliaceae | *Oreopanax avicenniifolius* (Kunth) Decne. & Planch. | Tree |
| Asteraceae | *Aristeguietia cacalioides* (Kunth) R.M. King & H. Rob. | Tree |
| Asteraceae | *Barnadesia arborea* Kunth | Tree |
| Asteraceae | *Gynoxys sp.* | Tree |
| Asteraceae | *Joseanthus cuatrecasasii* H. Rob. | Tree |
| Asteraceae | *Verbesina latisquama* S.F. Blake | Shrub |
| Berberidaceae | *Berberis multiflora* Benth. | Shrub |
| Campanulaceae | *Siphocampylus giganteus* (Cav.) G.Don | Tree |
| Caprifoliaceae | *Valeriana hirtella* Kunth | Shrub |
| Clethraceae | *Clethra fimbriata* Kunth | Tree |
| Cunnoniaceae | *Weinmannia fagaroides* Kunth | Tree |
| Dicksoniaceae | *Lophosoria quadripinnata* (J.F. Gmel.) C. Chr. | Shrub |
| Elaeocarpaceae | *Vallea stipularis* L. f. | Tree |
| Ericaceae | *Macleania rupestris* (Kunth) A.C. Sm. | Shrub |
| Escalloniaceae | *Escallonia myrtilloides* L. f. | Shrub |
| Melastomataceae | *Axinaea macrophylla* (Naudin) Triana | Tree |
| Melastomataceae | *Miconia aspergillaris* (Bonpl.) Naudin | Shrub |
| Melastomataceae | *Miconia crocea* (Desr.) Naudin | Shrub |
| Melastomataceae | *Miconia theaezans* (Bonpl.) Cogn. | Tree |
| Myricaceae | *Myrica parvifolia* Benth. | Tree |
| Myrtaceae | *Myrcianthes rhopaloides*(Kunth) McVaugh | Tree |
| Podocarpaceae | *Podocarpus sprucei* Parl. | Tree |
| Primulaceae | *Myrsine andina* (Mez) Pipoly | Tree |
| Primulaceae | *Myrsine dependens* (Ruiz & Pav.) Spreng. | Tree |
| Proteaceae | *Lomatia hirsuta* (Lam.) Diels | Tree |
| Proteaceae | *Oreocallis grandiflora*(Lam.) R.Br. | Tree |
| Rhamnaceae | *Rhamnus granulosa* (Ruiz & Pav.) Weberb. | Tree |
| Rosaceae | *Hesperomeles ferruginea (*Pers.) Benth. | Shrub |
| Rosaceae | *Polylepis lanuginosa* Kunth | Tree |
| Rosaceae | *Polylepis racemosa* Ruiz & Pav. | Tree |
| Symplocaceae | *Symplocos quitensis* Brand | Tree |
| Viburnaceae | *Viburnum triphyllum* Benth. | Tree |

**Table S2** Primers used to prepare samples of bulk soil and roots and nodules for Illumina sequencing, with barcodes highlighted in bold to indicate the regions used for sample identification in downstream sequencing analyses

| **PRIMERS FOR BULK SOIL SAMPLES** | |
| --- | --- |
| **Primer name** | **Sequence** |
| ill4_1B_783F | TCGTCGGCAGCGTCAGATGTGTATAAGAGACAG**AGCAGC**CAGGATTAGATACCC |
| ill4_3B_783F | TCGTCGGCAGCGTCAGATGTGTATAAGAGACAG**AGAGAG**CAGGATTAGATACCC |
| ill4_4B_783F | TCGTCGGCAGCGTCAGATGTGTATAAGAGACAG**AGATGC**CAGGATTAGATACCC |
| ill4_5B_1027R | GTCTCGTGGGCTCGGAGATGTGTATAAGAGACAG**AGCATG**CGACRRCCATGCANCACCT |
| ill4_8B_1027R | GTCTCGTGGGCTCGGAGATGTGTATAAGAGACAG**ATGAGC**CGACRRCCATGCANCACCT |
| ill4_10B_1027R | GTCTCGTGGGCTCGGAGATGTGTATAAGAGACAG**ATGCAG**CGACRRCCATGCANCACCT |
| **Primers for roots and nodules samples** | |
| endo799F_1B | TCGTCGGCAGCGTCAGATGTGTATAAGAGACAG**AGCAGC**AACMGGATTAGATACCCKG |
| endo799F_3B | TCGTCGGCAGCGTCAGATGTGTATAAGAGACAG**AGAGAG**AACMGGATTAGATACCCKG |
| endo799F_4B | TCGTCGGCAGCGTCAGATGTGTATAAGAGACAG**AGATGC**AACMGGATTAGATACCCKG |
| endo1107R_5B | GTCTCGTGGGCTCGGAGATGTGTATAAGAGACAG**AGCATG**GGGTTGCGCTCGTTGCG |
| endo1107R_8B | GTCTCGTGGGCTCGGAGATGTGTATAAGAGACAG**ATGAGC**GGGTTGCGCTCGTTGCG |
| endo1107R_10B | GTCTCGTGGGCTCGGAGATGTGTATAAGAGACAG**ATGCAG**GGGTTGCGCTCGTTGCG |

**Table S3** Results of generalized linear mixed models (GLMMs) and ANOVA testing the effect of land-use type (degraded vs. native forest) on bacterial α-diversity (ASV richness, evenness, and Shannon index) in bulk soil samples

| **BULK SOIL** | | | | | |
| --- | --- | --- | --- | --- | --- |
| **ASV richness (GLM)** |  |  |  |  |  |
|  | **Estimate** | **Std. Error** | **t value** | **Pr(>|t|)** |  |
| Intercept | 7.61776 | 0.04661 | 163.429 | 8.41e-09 |  |
| Site-Native Forest | -0.04714 | 0.06671 | -0.707 | 0.519 |  |
| **Evenness (ANOVA)** |  |  |  |  |  |
|  | **Df** | **Sum Sq** | **Mean sq** | **F value** | **Pr(>F)** |
| Site | 1 | 0.0008228 | 0.0008228 | 32.93 | **0.00457** |
| Residuals | 4 | 0.0000999 | 0.0000250 |  |  |
| **Shannon (ANOVA)** |  |  |  |  |  |
|  | **Df** | **Sum Sq** | **Mean sq** | **F value** | **Pr(>F)** |
| Site | 1 | 0.02706 | 0.027064 | 7.164 | **0.0554** |
| Residuals | 4 | 0.01511 | 0.003778 |  |  |

**Table S4** Results of generalized linear mixed models (GLMMs) and ANOVA testing the effect of land-use type (degraded vs. native forest), endophytic compartment (root vs. nodule), and their interaction on bacterial α-diversity (ASV richness, evenness, and Shannon index)

| **ENDOPHYTES** | | | | | |
| --- | --- | --- | --- | --- | --- |
| **ASV richness (GLM)** |  |  |  |  |  |
|  | **Estimate** | **Std. Error** | **t value** | **Pr(>|t|)** |  |
| Intercept | 5.57690 | 0.38347 | 14.543 | 5.53e-09 |  |
| Site-Native Forest | 0.05611 | 0.53486 | 0.105 | 0.918 |  |
| Compartment-Roots | 0.48979 | 0.48698 | 1.006 | 0.334 |  |
| Site*Compartment | -0.28215 | 0.69938 | -0.403 | 0.694 |  |
| **Evenness (ANOVA)** |  |  |  |  |  |
|  | **Df** | **Sum Sq** | **Mean sq** | **F value** | **Pr(>F)** |
| Site | 1 | 0.07152 | 0.07152 | 3.949 | 0.0702 |
| Compartment | 1 | 0.00035 | 0.00035 | 0.019 | 0.8923 |
| Site*Compartment | 1 | 0.05534 | 0.05534 | 3.055 | 0.1060 |
| Residuals | 12 | 0.21735 | 0.01811 |  |  |
| **Shannon (ANOVA)** |  |  |  |  |  |
|  | **Df** | **Sum Sq** | **Mean sq** | **F value** | **Pr(>F)** |
| Site | 1 | 2.482 | 2.4818 | 2.016 | 0.181 |
| Compartment | 1 | 0.214 | 0.2143 | 0.174 | 0.684 |
| Site*Compartment | 1 | 1.163 | 1.1626 | 0.945 | 0.350 |
| Residuals | 12 | 14.770 | 1.2308 |  |  |

**Table S5** PERMANOVA run on bulk soil samples, testing the effect of land-use type (degraded vs. native forest) on the composition of the bacterial communities

| **BULK SOIL** | | | | | |
| --- | --- | --- | --- | --- | --- |
|  | **Df** | **Sum of Sqs** | **R2** | **F** | **Pr(>F)** |
| Site | 1 | 0.84744 | 0.8639 | 25.389 | 0.1 |
| Residuals | 4 | 0.13351 | 0.1361 |  |  |
| Total | 5 | 0.98095 | 1.0000 |  |  |

**Table S6** PERMANOVA run on endophytic samples, testing the effect of land-use type (degraded vs. native forest), compartment (root vs. nodule), and their interaction on the composition of the bacterial communities

| **ENDOPHYTES** | | | | | |
| --- | --- | --- | --- | --- | --- |
|  | **Df** | **Sum of Sqs** | **R2** | **F** | **Pr(>F)** |
| Site | 1 | 0.5554 | 0.10612 | 1.7612 | **0.037** |
| Compartment | 1 | 0.4642 | 0.08869 | 1.4720 | 0.088 |
| Site*Compartment | 1 | 0.4299 | 0.08213 | 1.3631 | 0.146 |
| Residuals | 12 | 3.7842 | 0.72305 |  |  |
| Total | 15 | 5.2336 | 1.00000 |  |  |

**Table S7** Relative abundances (%) of bacterial phyla of bulk soil and endophytic samples in degraded (DF) and native forest (NF)

| **PHYLA** | **BULK SOIL** | | **ENDOPHYTES** | | | |
| --- | --- | --- | --- | --- | --- | --- |
| **ROOT** | | **NODULE** | |
| **NF** | **DF** | **NF** | **DF** | **NF** | **DF** |
| Abditibacteriota | - | - | - | 0.002 | - | 0.0004 |
| Acidobacteriota | 20.601 | 9.479 | 3.6688 | 0.4607 | 0.8133 | 1.5782 |
| Actinomycetota | 10.892 | 50.872 | 4.4337 | 2.853 | 1.1811 | 6.2604 |
| Armatimonadota | 0.0905 | 0.0021 | 0.081 | 0.0091 | 0.378 | - |
| Bacillota | 1.0005 | 0.7758 | 1.3607 | 0.2768 | 0.0625 | 0.1008 |
| Bacteroidota | 2.6229 | 1.6358 | 2.2206 | 0.8497 | 4.3814 | 0.4368 |
| candidate division WPS-2 | 0.0195 | - | - | - | - | - |
| Candidatus Saccharibacteria | 0.0916 | 0.1673 | - | - | - | 0.0015 |
| Chlamydiota | 0.465 | 0.081 | - | - | - | - |
| Chlorobiota | 0.0138 | - | - | - | - | - |
| Chloroflexota | 1.1992 | 0.1964 | 0.3204 | 0.0977 | 1.8128 | 0.0618 |
| Cyanobacteriota | 0.0159 | 0.0066 | 0.0729 | 0.0039 | 0.5808 | 0.0144 |
| Deinococcota | - | 0.0017 | - | 0.0026 | 0.0663 | 1.4042 |
| Elusimicrobiota | 0.0502 | 0.0032 | - | - | - | - |
| Gemmatimonadota | 0.2113 | 1.1736 | - | 0.0133 | 0.0328 | 0.0077 |
| Latescibacteria | 0.0038 | 0.0066 | - | - | - | - |
| Nitrospirota | 0.0134 | 0.0202 | - | 0.0093 | - | - |
| Parcubacteria | 0.0038 | - | - | - | - | - |
| Planctomycetota | 0.8349 | 0.4503 | 0.1248 | 0.0213 | 0.2685 | 0.5533 |
| Pseudomonadota | 50.927 | 30.262 | 83.181 | 94.377 | 89.127 | 89.14 |
| Spirochaetota | 0.0281 | - | 0.0352 | 0.0022 | 0.0596 | - |
| Verrucomicrobiota | 2.5862 | 0.7157 | 0.2189 | 0.0402 | 0.044 | 0.0088 |
| un_Bacteria | 8.3296 | 4.1501 | 4.2826 | 0.9809 | 1.1916 | 0.4319 |

**Table S8** Results of the ANOVA showing the differences in the relative abundances of the main bulk soil bacterial phyla between land-use types (degraded vs. native forest)

| **BULK SOIL** | | | | | |
| --- | --- | --- | --- | --- | --- |
|  | **Df** | **Sum Sq.** | **Mean Sq.** | **F value** | **Pr(>F)** |
| **Pseudomonadota** |  |  |  |  |  |
| Site | 1 | 640.5 | 640.5 | 211.6 | **0.00013** |
| Residuals | 4 | 12.1 | 3.0 |  |  |
| **Actinomycetota** |  |  |  |  |  |
| Site | 1 | 2397.6 | 2397.6 | 1082 | **5.09e-06** |
| Residuals | 4 | 8.9 | 2.2 |  |  |
| **Acidobacteriota** |  |  |  |  |  |
| Site | 1 | 185.54 | 185.54 | 349.5 | **4.82e-05** |
| Residuals | 4 | 2.12 | 0.53 |  |  |
| **Bacteroidota** |  |  |  |  |  |
| Site | 1 | 1.4615 | 1.4615 | 15.21 | **0.0175** |
| Residuals | 4 | 0.3844 | 0.0961 |  |  |
| **Verrucomicrobiota** |  |  |  |  |  |
| Site | 1 | 5.248 | 5.248 | 30.57 | **0.00523** |
| Residuals | 4 | 0.687 | 0.172 |  |  |
| **Bacillota** |  |  |  |  |  |
| Site | 1 | 0.0757 | 0.07573 | 0.812 | 0.419 |
| Residuals | 4 | 0.3732 | 0.09329 |  |  |
| **Chloroflexota** |  |  |  |  |  |
| Site | 1 | 1.5086 | 1.5086 | 35.55 | **0.00397** |
| Residuals | 4 | 0.1698 | 0.0424 |  |  |
| **Gemmatimonadota** |  |  |  |  |  |
| Site | 1 | 1.3891 | 1.3891 | 97.87 | **0.000586** |
| Residuals | 4 | 0.0568 | 0.0142 |  |  |
| **Planctomycetota** |  |  |  |  |  |
| Site | 1 | 0.2219 | 0.22190 | 2.975 | 0.16 |
| Residuals | 4 | 0.2984 | 0.07459 |  |  |
| **Chlamydiota** |  |  |  |  |  |
| Site | 1 | 1.5086 | 1.5086 | 35.55 | **0.00397** |
| Residuals | 4 | 0.1698 | 0.0424 |  |  |

**Table S9** Results of the ANOVA showing the differences in the relative abundances of the main root endophytic bacterial phyla between land-use types (degraded vs. native forest)

| **ROOT ENDOPHYTES** | | | | | |
| --- | --- | --- | --- | --- | --- |
|  | **Df** | **Sum Sq.** | **Mean Sq.** | **F value** | **Pr(>F)** |
| **Pseudomonadota** |  |  |  |  |  |
| Site | 1 | 250.7 | 250.73 | 3.62 | 0.106 |
| Residuals | 6 | 415.6 | 69.26 |  |  |
| **Actinomycetota** |  |  |  |  |  |
| Site | 1 | 5.00 | 4.997 | 0.358 | 0.572 |
| Residuals | 6 | 83.85 | 13.975 |  |  |
| **Acidobacteriota** |  |  |  |  |  |
| Site | 1 | 20.58 | 20.583 | 3.232 | 0.122 |
| Residuals | 6 | 38.21 | 6.369 |  |  |
| **Bacteroidota** |  |  |  |  |  |
| Site | 1 | 3.759 | 3.759 | 1.301 | 0.298 |
| Residuals | 6 | 17.340 | 2.890 |  |  |
| **Verrucomicrobiota** |  |  |  |  |  |
| Site | 1 | 0.06385 | 0.06385 | 1.497 | 0.267 |
| Residuals | 6 | 0.25589 | 0.04265 |  |  |
| **Bacillota** |  |  |  |  |  |
| Site | 1 | 2.349 | 2.3494 | 3.878 | 0.0965 |
| Residuals | 6 | 3.635 | 0.6059 |  |  |
| **Chloroflexota** |  |  |  |  |  |
| Site | 1 | 0.0992 | 0.09923 | 1.054 | 0.344 |
| Residuals | 6 | 0.5651 | 0.09418 |  |  |
| **Cyanobacteriota** |  |  |  |  |  |
| Site | 1 | 0.00950 | 0.00950 | 0.894 | 0.381 |
| Residuals | 6 | 0.06377 | 0.01063 |  |  |
| **Planctomycetota** |  |  |  |  |  |
| Site | 1 | 0.02142 | 0.02142 | 1.444 | 0.275 |
| Residuals | 6 | 0.08904 | 0.01484 |  |  |
| **Armatimonadota** |  |  |  |  |  |
| Site | 1 | 0.01032 | 0.010323 | 3.557 | 0.108 |
| Residuals | 6 | 0.01741 | 0.002902 |  |  |

**Table S10** Results of the ANOVA showing the differences in the relative abundances of the main root endophytic bacterial phyla between land-use types (degraded- vs. native forest)

| **NODULE ENDOPHYTES** | | | | | |
| --- | --- | --- | --- | --- | --- |
|  | **Df** | **Sum Sq.** | **Mean Sq.** | **F value** | **Pr(>F)** |
| **Pseudomonadota** |  |  |  |  |  |
| Site | 1 | 0 | 0.0 | 0 | 0.999 |
| Residuals | 6 | 1030 | 171.7 |  |  |
| **Actinomycetota** |  |  |  |  |  |
| Site | 1 | 51.6 | 51.6 | 2.244 | 0.185 |
| Residuals | 6 | 138.0 | 23.0 |  |  |
| **Acidobacteriota** |  |  |  |  |  |
| Site | 1 | 1.17 | 1.170 | 0.435 | 0.534 |
| Residuals | 6 | 16.13 | 2.689 |  |  |
| **Bacteroidota** |  |  |  |  |  |
| Site | 1 | 31.12 | 31.12 | 1.19 | 0.317 |
| Residuals | 6 | 156.86 | 26.14 |  |  |
| **Verrucomicrobiota** |  |  |  |  |  |
| Site | 1 | 0.002471 | 0.002471 | 0.631 | 0.457 |
| Residuals | 6 | 0.023499 | 0.003916 |  |  |
| **Bacillota** |  |  |  |  |  |
| Site | 1 | 0.002925 | 0.002925 | 1.823 | 0.226 |
| Residuals | 6 | 0.009625 | 0.001604 |  |  |
| **Chloroflexota** |  |  |  |  |  |
| Site | 1 | 6.13 | 6.133 | 0.966 | 0.364 |
| Residuals | 6 | 38.07 | 6.346 |  |  |
| **Deinococcota** |  |  |  |  |  |
| Site | 1 | 3.580 | 3.580 | 2.51 | 0.164 |
| Residuals | 6 | 8.558 | 1.426 |  |  |
| **Planctomycetota** |  |  |  |  |  |
| Site | 1 | 0.162 | 0.1622 | 0.224 | 0.653 |
| Residuals | 6 | 4.351 | 0.7252 |  |  |
| **Cyanobacteriota** |  |  |  |  |  |
| Site | 1 | 0.642 | 0.6417 | 0.951 | 0.367 |
| Residuals | 6 | 4.050 | 0.6750 |  |  |

**Table S11** Results of linear mixed models (LMMs) testing the effect of land-use type (degraded vs. native forest) on root nodule length, width, and weight. The models include root length as a covariate and the tree replicates collected for each tree nested into the tree identity as a random factor

|  | **Estimate** | **Std. Error** | **Df** | **t value** | **Pr(>|t|)** |
| --- | --- | --- | --- | --- | --- |
| **Nodule length** |  |  |  |  |  |
| Intercept | 7.7605887 | 0.6557186 | 8.2833331 | 11.835 | 1.78e-06 |
| SiteNF | -0.710038 | 0.7283785 | 5.3021221 | -0.975 | 0.372 |
| Root length | 0.0006573 | 0.0004761 | 3.1743546 | 1.381 | 0.257 |
| **Nodule width** |  |  |  |  |  |
| Intercept | 2.5764129 | 1.3168564 | 7.8427408 | 1.956 | 0.0868 |
| SiteNF | 0.2912830 | 1.5421867 | 5.1826150 | 0.189 | 0.8574 |
| Root length | 0.0008080 | 0.0009675 | 1.6416213 | 0.835 | 0.5075 |
| **Nodule weight** |  |  |  |  |  |
| Intercept | 10.439270 | 4.893244 | 8.297694 | 2.133 | 0.0642 |
| SiteNF | -0.585716 | 5.705177 | 6.208275 | -0.103 | 0.9215 |
| Root length | 0.005808 | 0.003237 | 1.953111 | 1.794 | 0.2177 |
